# Supplementary material for: Understanding the physiology of human defaecation and disorders of continence and evacuation
Source: Springer Nature journal article supplement (doi:10.1038/s41575-021-00487-5), 2021-08-09
Supplement: 41575_2021_487_MOESM1_ESM.pdf [file 41575_2021_487_MOESM1_ESM.pdf]

**Supplementary information**

---

**Understanding the physiology of human defaecation and disorders of continence and evacuation**

---

In the format provided by the authors and unedited

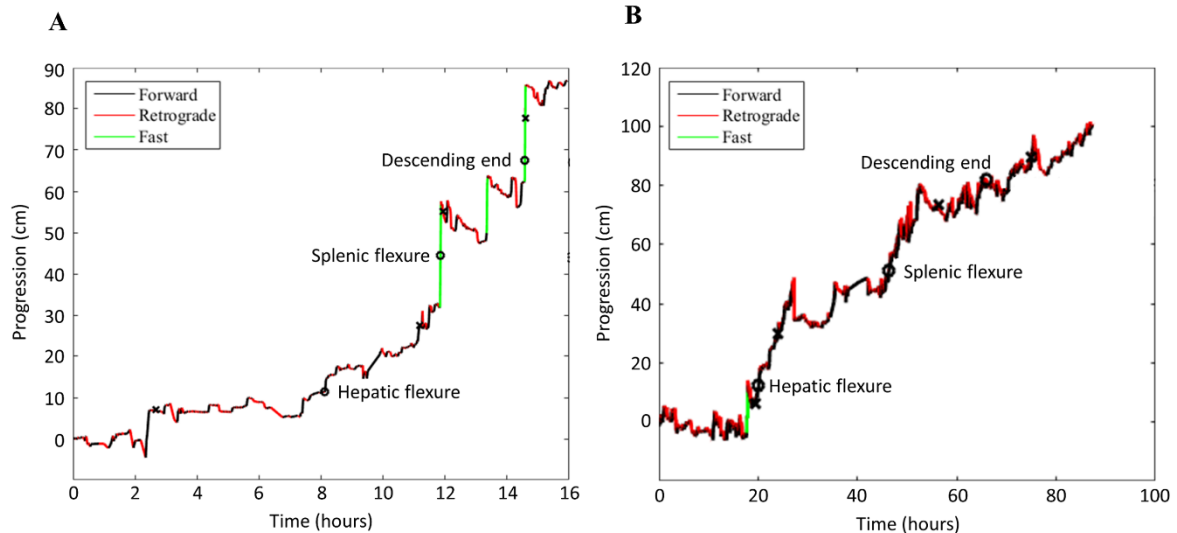

**Supplementary Figure 1 | Transit time in the human colon in health and disease.** Time-progression patterns of the 3D-Transit capsule through the colon of: (A) a healthy volunteer, and (B) a patient with chronic constipation. Anatomical position in the colon is represented by the distance in cm from caecum to the rectum (Y-axis). Time in hours is on the X-axis. In the healthy individual, the capsule traverses the entire colon in ~16 hours. There is relatively slow progression through the right colon (caecum to mid-transverse colon in ~12 hours), but rapid progression through the left colon, including three fast movements spanning 10–20 cm each. Little retrograde movement is seen. In the patient with constipation, colonic transit is ~90 hours in total. There is stasis in the both the caecum for ~18 hours, and also the left transverse colon for a further ~20 hours. Throughout, there is considerable retrograde movement of the capsule. Part a adapted with permission from ref 1, WILEY. © 2018 John Wiley & Sons Ltd. Part b figure courtesy of E. Mark, Mech-Sense, Department of Gastroenterology and Hepatology, Aalborg University Hospital, Denmark.

#### Supplementary reference list

1. Mark, E.B. et al. Ambulatory assessment of colonic motility using the electromagnetic capsule tracking system. *Neurogastroenterol. Motil.* **31**, e13451 (2019).
